# Supplementary material for: Neuronal hemoglobin affects dopaminergic cells' response to stress
Source: PubMed Central journal article supplement (PMC5386368; doi:10.1038/cddis.2016.458), 2017-01-05
Supplement: cddis2016458x1.pdf [file cddis2016458x1.pdf]

## **Supplementary Information**

### **Neuronal hemoglobin affects dopaminergic cells' response to stress**

Marta Codrich, Maria Bertuzzi, Roberta Russo, Margherita Francescato, Stefano Espinoza, Lorena Zentilin, Mauro Giacca, Daniela Cesselli, Antonio Paolo Beltrami, Paolo Ascenzi, Silvia Zucchelli, Francesca Persichetti, Giampiero Leanza & Stefano Gustincich

## **Supplementary References**

## **Supplementary Figure Legends**

## **Supplementary Table**

Supplementary Table S1

## **Supplementary Figures**

Supplementary Figure S1, S2, S3, S4, S5

## Supplementary References

- 1 Kiryk A, Sowodniok K, Kreiner G, Rodriguez-Parkitna J, Sönmez A, Górkiewicz T *et al.* Impaired rRNA synthesis triggers homeostatic responses in hippocampal neurons. *Front Cell Neurosci* 2013; **7**: 207.
- 2 Oie S, Matsuzaki K, Yokoyama W, Tokunaga S, Waku T, Han S-I *et al.* Hepatic rRNA transcription regulates high-fat-diet-induced obesity. *Cell Rep* 2014; **7**: 807–820.
- 3 Mauro C, Leow SC, Anso E, Rocha S, Thotakura AK, Tomatore L *et al.* NF- $\kappa$ B controls energy homeostasis and metabolic adaptation by upregulating mitochondrial respiration. *Nat Cell Biol* 2011; **13**: 1272–9.

## Supplementary Figure Legends

**Supplementary Figure S1. Densitometric analysis.** Differentiated Hb cells and control cells were treated with MPP<sup>+</sup> (a, c, e, g) or rotenone (b, d, f, h, l, m) at the indicated concentrations for 16 hours. **(a, b)** Densitometric analysis of pro-Caspase-3 expression. Pro-Caspase-3 levels were normalized to  $\beta$ -actin. Untreated cells was used as reference and set to 100%. (n=5, n=4) **(c, d)** Densitometric analysis of cleaved Caspase-3 expression. Cleaved Caspase-3 levels were normalized to  $\beta$ -actin. Untreated cells was used as reference and set to 100%. (n=5, n=6) **(e, f)** Densitometric analysis of nuclear FLAG ( $\alpha$ -globin) expression. Nuclear  $\alpha$ -globin levels were normalized to  $\beta$ -actin. Untreated cells was used as reference and set to 100%. (n=3, n=3) **(g, h)** Densitometric analysis of nuclear MYC ( $\beta$ -globin) expression. Nuclear  $\beta$ -globin levels were normalized to  $\beta$ -actin. Untreated cells was used as reference and set to 100%. (n=3, n=3) **(i)** Densitometric analysis of P-4EB-P1 expression. P-4EB-P1 levels were normalized to  $\beta$ -actin. Untreated control cells was used as reference and set to 100%. (n=3) **(m)** Densitometric analysis of LC3 II expression. LC3 II levels were normalized to  $\beta$ -actin. Untreated control cells was used as reference and set to 100%. (n=6) Values are mean  $\pm$  SD. Data were evaluated statistically by Student's t-test. When appropriate the p-values were adjusted for multiple testing using the Benjamini-Hochberg method to control the false discovery rate. Resulting p-values are indicated.

**Supplementary Figure S2. Hb toxicity doesn't depend on O<sub>2</sub> binding.** (a, b) Characterization of Hb cells (Hb), mutated Hb cells (mut Hb) and control cells (control). **(a)** Western blot analysis of cell lysates was carried out with anti-FLAG ( $\alpha$ -globin), anti-MYC ( $\beta$ -globin), anti-Hemoglobin and anti-GFP antibodies.  $\beta$ -actin was used as loading control. **(b)** Double immunofluorescence was performed with anti-FLAG ( $\alpha$ -globin) and anti-MYC ( $\beta$ -globin) antibodies. Scale bar 10  $\mu$ m. **(c)** Differentiated Hb cells, mut Hb cells and control cells were treated with rotenone at the indicated concentrations for 16 hours. Western blot analysis of cleaved Caspase-3 expression.  $\beta$ -actin was used as loading control. (n=4) **(d)** Differentiated mut Hb cells were treated with rotenone at the

indicated concentrations for 16 hours. Western blot analysis of cellular fractions was carried out with anti-FLAG ( $\alpha$ -globin) antibody. Anti-TH and anti-UBF antibodies were used to visualize specifically cytoplasm and nucleus compartment respectively.  $\beta$ -actin was used as loading control. (n=3)

**Supplementary Figure S3. Dimer structure of overexpressed Hb ( $\alpha\beta$ ) is not altered in cellular model of PD.** Differentiated Hb cells were treated for 16 hours with MPP<sup>+</sup> (a) or with rotenone (b) at the indicated concentration. **(a, b)** Lysates of Hb cells were immunoprecipitated (IP) with anti-FLAG agarose beads and bound proteins were revealed by immunoblot (IB) with anti-MYC antibody. Lysates were tested for the expression of FLAG ( $\alpha$ -globin) and MYC ( $\beta$ -globin) proteins.  $\beta$ -actin was used as loading control. (n=4, n=4) **(c)** qRT-PCR of p53 levels. p53 levels were normalized to  $\beta$ -actin. Untreated control cells was used as reference and set to 1. (n=5) Values are mean  $\pm$  SD. Data were evaluated statistically by Student's t-test. The p-values were adjusted for multiple testing using the Benjamini-Hochberg method to control the false discovery rate. Resulting p-values are indicated.

**Supplementary Figure S4. AAV9-mediated delivery of Hb in SNpc of mouse brain.** **(a)** PCR analysis of dissected controlateral (CL) and ipsilateral (IL) side of substantia nigra (SN) and striatum. Cortex (CTX) was used as negative control. PCR was carried out with FLAG ( $\alpha$ -globin), MYC ( $\beta$ -globin) and TH primers. Additional controls were used: pcDNA3-2XFLAG- $\alpha$ -globin or pcDNA3.1- $\beta$ -globin-MYC or DA cell sample (+) for the efficiency of PCR amplification; negative control of retrotranscription (-) was included. **(b)** Western blot analysis of dissected CL and IL side of SN and CTX. Western blot was carried out with anti-FLAG ( $\alpha$ -globin), anti-MYC ( $\beta$ -globin) and anti-Hemoglobin antibodies.  $\beta$ -actin was used as loading control. **(c)** qRT-PCR of Hb levels.  $\alpha$ -globin (Hba) and  $\beta$ -globin (Hbb) levels were normalized to  $\beta$ -actin. Values are expresses as fold change relative to the controlateral side of AAV9-control mice, arbitrary set to 1. (n=2) **(d)**

Immunohistochemistry of coronal sections of AAV9-Hb mouse brain. SN was stained with anti-TH antibody. Infected cells were stained with anti-FLAG ( $\alpha$ -globin) antibody. Nuclei were visualized with DAPI. Scale bar 200  $\mu$ m. Enlargement of ipsilateral side (scale bar 50  $\mu$ m). **(e)**

Immunohistochemistry of coronal sections of AAV9-Hb mouse brain. SN was stained with anti-TH antibody. Infected cells were stained with anti-MYC ( $\beta$ -globin) antibody. Nuclei were visualized with DAPI. Scale bar 200  $\mu$ m. Enlargement of ipsilateral side (scale bar 50  $\mu$ m). **(f)**

Immunohistochemistry of coronal sections of AAV9-Hb mouse brain. SN was stained with anti-TH and anti-Hemoglobin antibodies. Scale bar 50  $\mu$ m. **(g)** Double immunohistochemistry of ipsilateral side of AAV9-Hb mouse brain was performed with anti-FLAG ( $\alpha$ -globin) and anti-MYC ( $\beta$ -globin) antibodies. Nuclei were visualized with DAPI. Scale bar 30  $\mu$ m.

**Supplementary Figure S5. Dopamine content in Hb and control cells.** **(a)** The level of dopamine was measured in differentiated Hb and control cells by HPLC. (n=3) Values are mean  $\pm$  SD. Data were evaluated statistically by Student's t-test. Resulting p-values are indicated.
