# Supplementary material for: Neuronal hemoglobin affects dopaminergic cells' response to stress
Source: PubMed Central journal article supplement (PMC5386368; doi:10.1038/cddis.2016.458), 2017-01-05
Supplement: cddis2016458x2.pdf [file cddis2016458x2.pdf]

## Supplementary Table S1

### List of primers

| Primer                       | Used for    | Primer Sequence 5'-3'                                                               |
|------------------------------|-------------|-------------------------------------------------------------------------------------|
| FLAG- $\alpha$ -globin       | PCR         | fw: GCGCAAGCTTATGGACTACAAGGA<br>rev: ATATCTCGAGTTAACGGTACTTGG                       |
| $\beta$ -globin-MYC          | PCR         | fw: GCGCATGGTGCACCTGACTGATGC<br>rev: ATATTTACAGGTCCTCCTCGCTGA                       |
| TH                           | PCR         | fw: CCGTCTCAGAGCAGGATACC<br>rev: CGAATACCACAGCCTCCAATG                              |
| pre-rRNA pair 1 <sup>1</sup> | qRT-PCR     | fw: ACTGACACGCTGTCTTTCC<br>rev: GACAGCTTCAGGCACCGCGA                                |
| pre-rRNA pair 2 <sup>2</sup> | qRT-PCR     | fw: CTCTTGTTCTGTGTCTGCC<br>rev: GCCCGCTGGCAGAACGAGAAG                               |
| p53 <sup>3</sup>             | qRT-PCR     | fw: CACAGCGTGGTGGTACCTTA<br>rev: TCTTCTGTACGGCGGTCTCT                               |
| $\beta$ -actin               | qRT-PCR     | fw: CACACCCGCCACCAGTTC<br>rev: CCCATTCCCACCATCACACC                                 |
| $\alpha$ -globin H87G        | Mutagenesis | fw: GCTCTGAGCGACCTGGGTGCCCAAGCTGCGTG<br>rev: CACGCAGCTTGTGGGCACCCAGGTCGCTCAGAGC     |
| $\beta$ -globin H92G         | Mutagenesis | fw: CAGCCTCAGTGAGCTCGGCTGTGACAAGCTGCATG<br>rev: CATGCAGCTTGTCACAGCCGAGCTCACTGAGGCTG |
